# Supplementary material
Source: MDPI journal article supplement (https://www.mdpi.com/1424-2818/10/2/45)
Supplement: s1 [file s1]

**Table S1.** Morphometric (mass and forearm length) data for study species. Also presented are details about wing aspect ratio, wing loading, known roost types and diet.

| Species                      | Mass (g) | Forearm (mm) | Aspect ratio                   | Wing loading (N m <sup>-2</sup> ) | Roosts                                                             | Diet                                                                                                                   |
|------------------------------|----------|--------------|--------------------------------|-----------------------------------|--------------------------------------------------------------------|------------------------------------------------------------------------------------------------------------------------|
| <i>Nyctophilus corbeni</i>   | 14.5-17  | 44-46        | Not available                  | Not available                     | Hollows, fissures [1]<br>(Law et al. 2016).                        | ≥70 % lepidopterans [1]                                                                                                |
| <i>Nyctophilus geoffroyi</i> | 5-7      | 33-37        | 5.88±0.30 [2]<br>5.60±0.55 [3] | 6.22±0.50 [2]<br>5.91±0.97 [3]    | Hollows, fissures [4,5]                                            | Dominated by lepidopterans. Also known to consume coleopterans, blattodeans, orthopterans, dipterans and arachnids [6] |
| <i>Nyctophilus gouldi</i>    | 8-11     | 38-40        | 5.77±0.49 [2]<br>5.46±0.30 [3] | 6.55±0.94 [2]<br>6.20±1.25 [3]    | Hollows, fissures [7]                                              | Dominated by lepidopterans [8] (Gonsalves et al. 2013)                                                                 |
| <i>Vespadelus vulturnus</i>  | 3.5-4.5  | 25-28        | 5.19±0.54 [3]                  | 6.36±0.53 [3]                     | Hollows [9, 10]<br>(Campbell et al. 2005;<br>Rueegger et al. 2018) | Dominated by lepidopterans but also known to take dipterans [8] (Gonsalves et al. 2013)                                |

1. Law, B., Gonsalves, L., Chidel, M., Brassil, T. Subtle use of a disturbance mosaic by the south-eastern long-eared bat (*Nyctophilus corbeni*): an extinction-prone, narrow-space bat. *Wildl. Res.* **2016**, *43*, 153-168.
2. Brigham, R. M., Francis, R. L., Hamdorf, S. Microhabitat use by two species of *Nyctophilus* bats: a test of ecomorphology theory. *Aust. J. Zool.* **1997**, *45*, 553-560.
3. Rhodes, M. P. Assessment of sources of variance and patterns of overlap in microchiropteran wing morphology in southeast Queensland, Australia. *Can J Zool.* **2002** *80* 450-460.
4. Webala, P. W., Craig, M. D., Law, B. S., Wayne, A. F., Bradley, J. S. Roost site selection by southern forest bat *Vespadelus regulus* and Gould's long-eared bat *Nyctophilus gouldi* in logged jarrah forests; south-western Australia. *For. pEcol. Manage.* **2010**, *260*, 1780-1790.
5. Threlfall, C. G., Law, B., Banks, P. B. Roost selection in suburban bushland by the urban sensitive bat *Nyctophilus gouldi*. *J. Mamm.* **2013**, *94*, 307-319.
6. Vestjens, W. J. M., Hall, L. S. Stomach contents of forty-two species of bats from the Australasian region. *Wildl. Res.* **1977**, *4*, 207-218.
7. Lumsden, L. F., Bennett, A. F., Silins, J. E. Selection of roost sites by the lesser long-eared bat (*Nyctophilus geoffroyi*) and Gould's wattled bat (*Chalinolobus gouldii*) in south-eastern Australia. *J. Zool.* **2002**, *257*, 207-218.
8. Gonsalves, L., Bicknell, B., Law, B., Webb, C., Monamy, V. Mosquito consumption by insectivorous bats: does size matter? *PloS One.* **2013**, *8*, e77183.
9. Campbell, S., Lumsden, L. F., Kirkwood, R., Coulson, G. Day roost selection by female little forest bats (*Vespadelus vulturnus*) within remnant woodland on Phillip Island, Victoria. *Wildl. Res.* **2005**, *32*, 183-191.
10. Rueegger, N., Law, B., Goldingay, R. Interspecific differences and commonalities in maternity roosting by tree cavity-roosting bats over a maternity season in a timber production landscape. *PloS One.* **2018**, *13*, e0194429.
